# Supplementary material
Source: Preprints.org preprint supplement (doi:10.20944/preprints202005.0391.v2)
Supplement: Supplementary file 1 [file supplementary]

## Sheet: Calculator Household 1
Household members	Individual Risk Level	% risk	Location Risk Level	% risk	Location Prevalance	Totals
1	Level 1	0	Level 2	0.02	0.027898	Household social risk
2	Level 1	0				0.33
3	Level 1	0
4	Level 3	0.33				Location risk
		0				0.00055796
		0
		0				Household-based location risk
		0				0.000184127
Levels	Individual				Location
Risk level 1	Quarantine with no contact except within the household.			Strict stay at home, enough testing, contact tracing, quarantine of all contacts and suspected cases.
0	No exposure
Risk level 2	Stay-at-home with essential contact only, remote workplace			Stay-at-home with essential contact only, remote workplace/schools, essential businesses with strict social distancing and disinfecting measures
0.02	Low exposure, low risk - 98% safety on contact, one contact/day
Risk level 3	Essential worker in an environment practicing strict social distancing measures or in shared housing practicing social distancing measures			Business open but all practicing social distancing or predominately stay at home with a non-negligible percent of the population not social distancing
0.33	High/consistent exposure, but of low risk - 98% safety on contact, 20 contacts/day
Risk level 4	Practicing intermittent social distancing			Only partial practicing of social distancing
0.75	Low - medium exposure, but of high risk - 50% safety on contact, 2 contacts/day
Risk level 5	Essential worker in an environment practicing no social distancing measures or not practicing social distancing			Business as usual - Not practicing social distancing and no testing/quarantining
1	Consistent exposure, high risk - 50% safety on contact, 20 contacts/day

## Sheet: Calculator Household 2
Household members	Individual Risk Level	% risk	Location Risk Level	% risk	Location Prevalance	Totals
1	Level 1	0	Level 4	0.75	0.00182445	Household social risk
2	Level 1	0				0.3434
3	Level 2	0.02
4	Level 3	0.33				Location risk
		0				0.00136834
		0
		0				Household-based location risk
		0				0.000469887
Levels	Individual				Location
Risk level 1	Quarantine with no contact except within the household.			Strict stay at home, enough testing, contact tracing, quarantine of all contacts and suspected cases.
0	No exposure
Risk level 2	Stay-at-home with essential contact only, remote workplace			Stay-at-home with essential contact only, remote workplace/schools, essential businesses with strict social distancing and disinfecting measures
0.02	Low exposure, low risk - 98% safety on contact, one contact/day
Risk level 3	Essential worker in an environment practicing strict social distancing measures or in shared housing practicing social distancing measures			Business open but all practicing social distancing or predominately stay at home with a non-negligible percent of the population not social distancing
0.33	High/consistent exposure, but of low risk - 98% safety on contact, 20 contacts/day
Risk level 4	Practicing intermittent social distancing			Only partial practicing of social distancing
0.75	Low - medium exposure, but of high risk - 50% safety on contact, 2 contacts/day
Risk level 5	Essential worker in an environment practicing no social distancing measures or not practicing social distancing			Business as usual - Not practicing social distancing and no testing/quarantining
1	Consistent exposure, high risk - 50% safety on contact, 20 contacts/day

## Sheet: Pooling Households
Households	T_h household risk	Include in Pool?	Value	Totals	Risk multiplier
1	0.000184127	Yes	0.000184127	Full pool risk	3.55151
2	0.000469887	Yes	0.000469887	0.000653928	1.39167
3	2.73e-05	No	0		1
4	0.00084	No	0	Limited pool risk	1
	0	No	0	0.000653928	1
	0	No	0		1
	0	No	0		1
	0	No	0		1

## Sheet: Read Me
To use this sheet, go to File>Make a Copy. Then you can edit it
To add more households, go to the triangle by the household sheet name > duplicate.
Remember that prevalance is caculated as per capita active cases * 10. Make sure to consistently define your location - either as town, zip code or county
Number of active cases in location		Number of people in location		Prevalance
823		295003		0.027898
The Prevalance is multiplied by 10 because we are assuming that for every 1 case identified, there are 9 cases that have not been identified
Some towns already give per capita rates. However, these are usually total cases, not active cases. One assumption you could make is that half the cases have recovered.
Cases per 100K	out of	% active	Prevalance
607	100000	0.5	0.03035
